# Supplementary material for: The Combined Treatment of Curcumin with Verapamil Ameliorates the Cardiovascular Pathology in a Williams–Beuren Syndrome Mouse Model
Source: MDPI journal article supplement (doi:10.3390/ijms24043261), 2023-02-07
Supplement: s1 [file s1]

**Supplemental Table S1: Statistical data of SBP and BPM**

| <b>Three-way ANOVA Sex effect SBP</b> | <b>F (DFn, DFd)</b> | <b>P value</b> |
|---------------------------------------|---------------------|----------------|
| Treatment                             | F (3, 123) = 4.692  | P=0.0039       |
| Genotype                              | F (1, 123) = 57.05  | P<0.0001       |
| Sex                                   | F (1, 123) = 3.103  | P=0.0807       |
| Treatment x Genotype                  | F (3, 123) = 3.819  | P=0.0117       |
| Treatment x Sex                       | F (3, 123) = 0.6550 | P=0.5813       |
| Genotype x Sex                        | F (1, 123) = 0.9970 | P=0.3200       |
| Treatment x Genotype x Sex            | F (3, 123) = 0.1893 | P=0.9035       |

| <b>Three-way ANOVA sex effect BPM</b> | <b>F (DFn, DFd)</b> | <b>P value</b> |
|---------------------------------------|---------------------|----------------|
| Treatment                             | F (3, 125) = 5.543  | P=0.0013       |
| Genotype                              | F (1, 125) = 19.71  | P<0.0001       |
| Sex                                   | F (1, 125) = 0.4535 | P=0.5019       |
| Treatment x Genotype                  | F (3, 125) = 1.623  | P=0.1873       |
| Treatment x Sex                       | F (3, 125) = 0,2480 | P=0.8627       |
| Genotype x Sex                        | F (1, 125) = 1.456  | P=0.2299       |
| Treatment x Genotype x Sex            | F (3, 125) = 0.5289 | P=0.6632       |

| <b>Two-way ANOVA SBP</b> | <b>F (DFn, DFd)</b> | <b>P value</b> |
|--------------------------|---------------------|----------------|
| Interaction              | F (3, 131) = 4.032  | P=0.0088       |
| Treatment                | F (3, 131) = 5.777  | P=0.0010       |
| Genotype                 | F (1, 131) = 62.25  | P<0.0001       |

| <b>Tukey's multiple comparisons test</b> | <b>Adjusted P Value</b> |
|------------------------------------------|-------------------------|
| <b>VEHICLE:WT vs. VEHICLE:CD</b>         | P<0.0001                |
| VEHICLE:WT vs. VER:WT                    | P>0.9999                |
| <b>VEHICLE:WT vs. VER:CD</b>             | P=0.0003                |
| VEHICLE:WT vs. CUR:WT                    | P>0.9999                |
| <b>VEHICLE:WT vs. CUR:CD</b>             | P=0.0013                |
| VEHICLE:WT vs. CURVER:WT                 | P>0.9997                |
| VEHICLE:WT vs. CURVER:CD                 | P>0.9995                |
| VEHICLE:CD vs. VER:WT                    | P<0.0001                |
| VEHICLE:CD vs. VER:CD                    | P=0.9381                |
| VEHICLE:CD vs. CUR:WT                    | P<0.0001                |
| VEHICLE:CD vs. CUR:CD                    | P=0.6030                |

VEHICLE:CD vs. CURVER:WT

P<0.0001

VEHICLE:CD vs. CURVER:CD

P<0.0001

| Two-way ANOVA BPM | F (DFn, DFd)       | P value  |
|-------------------|--------------------|----------|
| Interaction       | F (3, 133) = 1,692 | P=0,1718 |
| Treatment         | F (3, 133) = 5,677 | P=0,0011 |
| Genotype          | F (1, 133) = 21,49 | P<0,0001 |

## Supplemental Table S2: Statistical data of Ascending Aorta parameters

| ANOVA wall thickness T. Media     | F (DFn, DFd)      | P value  |
|-----------------------------------|-------------------|----------|
| Interaction                       | F (1, 30) = 11,60 | P=0,0019 |
| Treatment                         | F (1, 30) = 9,898 | P=0,0037 |
| Genotype                          | F (1, 30) = 27,99 | P<0,0001 |
| Tukey's multiple comparisons test | Adjusted P Value  |          |
| VEHICLE:WT vs. VEHICLE:CD         | P<0,0001          |          |
| VEHICLE:WT vs. CURVER:CD          | P=0,4408          |          |
| VEHICLE:CD vs. CURVER:CD          | P=0,0004          |          |

| Two-way ANOVA diameter Lumen | F (DFn, DFd)      | P value  |
|------------------------------|-------------------|----------|
| Interaction                  | F (1, 30) = 1,262 | P=0,2701 |
| Treatment                    | F (1, 30) = 19,34 | P=0,0001 |
| Genotype                     | F (1, 30) = 42,17 | P<0,0001 |

| Two-way ANOVA ELN content | F (DFn, DFd)        | P value  |
|---------------------------|---------------------|----------|
| Interaction               | F (1, 30) = 0,05941 | P=0,8091 |
| Treatment                 | F (1, 30) = 0,5833  | P=0,4510 |
| Genotype                  | F (1, 30) = 43,72   | P<0,0001 |

| Two-way ANOVA Density VSMC | F (DFn, DFd)       | P value  |
|----------------------------|--------------------|----------|
| Interaction                | F (1, 20) = 0,1171 | P=0,7358 |
| Treatment                  | F (1, 20) = 9,485  | P=0,0059 |
| Genotype                   | F (1, 20) = 53,93  | P<0,0001 |

| Two-way ANOVA Total Collagen | F (DFn, DFd)      | P value  |
|------------------------------|-------------------|----------|
| Interaction                  | F (1, 45) = 20,81 | P<0,0001 |
| Treatment                    | F (1, 45) = 2,773 | P=0,1028 |

|          |                   |          |
|----------|-------------------|----------|
| Genotype | F (1, 45) = 4,878 | P=0,0323 |
|----------|-------------------|----------|

**Tukey's multiple comparisons test****Adjusted P Value**

|                           |          |
|---------------------------|----------|
| VEHICLE:WT vs. VEHICLE:CD | P<0,0001 |
| VEHICLE:WT vs. CURVER:CD  | P=0,9769 |
| VEHICLE:CD vs. CURVER:CD  | P=0,0005 |

**Two-way ANOVA Green Collagen****F (DFn, DFd)****P value**

|             |                   |          |
|-------------|-------------------|----------|
| Interaction | F (1, 48) = 19,20 | P<0,0001 |
| Treatment   | F (1, 48) = 2,121 | P=0,1518 |
| Genotype    | F (1, 48) = 17,77 | P=0,0001 |

**Tukey's multiple comparisons test****Adjusted P Value**

|                           |          |
|---------------------------|----------|
| VEHICLE:WT vs. VEHICLE:CD | P<0,0001 |
| VEHICLE:WT vs. CURVER:CD  | P=0,1822 |
| VEHICLE:CD vs. CURVER:CD  | P=0,0015 |

**Two-way ANOVA Red Collagen****F (DFn, DFd)****P value**

|             |                    |          |
|-------------|--------------------|----------|
| Interaction | F (1, 46) = 8,411  | P=0,0057 |
| Treatment   | F (1, 46) = 0,4011 | P=0,5296 |
| Genotype    | F (1, 46) = 0,3175 | P=0,5759 |

**Tukey's multiple comparisons test****Adjusted P Value**

|                           |          |
|---------------------------|----------|
| VEHICLE:WT vs. VEHICLE:CD | P=0,2564 |
| VEHICLE:WT vs. CURVER:CD  | P=0,8036 |
| VEHICLE:CD vs. CURVER:CD  | P=0,0853 |

### Supplemental Table S3: Statistical data of Hearts

| Three way ANOVA Sex effect               | F (DFn, DFd)             | P value         |
|------------------------------------------|--------------------------|-----------------|
| Treatment                                | F (1, 97) = 22,70        | P<0,0001        |
| Genotype                                 | F (1, 97) = 15,48        | P=0,0002        |
| Sex                                      | F (1, 97) = 0,1639       | P=0,6865        |
| Treatment x Genotype                     | F (1, 97) = 11,97        | P=0,0008        |
| Treatment x Sex                          | F (1, 97) = 6,940        | P=0,0098        |
| Genotype x Sex                           | F (1, 97) = 0,07919      | P=0,7790        |
| <b>Treatment x Genotype x Sex</b>        | <b>F (1, 97) = 6,555</b> | <b>P=0,0120</b> |
| <b>Šídák's multiple comparisons test</b> | <b>Adjusted P Value</b>  |                 |

|                                         |          |
|-----------------------------------------|----------|
| VEHICLE:WT-MALES vs. VEHICLE:WT-FEMALES | P=0,0777 |
| VEHICLE:CD-MALES vs. VEHICLE:CD-FEMALES | P>0,9999 |
| CURVER:WT-MALES vs. CURVER:WT-FEMALES   | P=0,1547 |
| CURVER:CD-MALES vs. CURVER:CD-FEMALES   | P>0,9999 |

| Two-way ANOVA Heart vs Body weight | F (DFn, DFd)       | P value  |
|------------------------------------|--------------------|----------|
| Interaction                        | F (1, 101) = 20,76 | P<0,0001 |
| Treatment                          | F (1, 101) = 15,13 | P=0,0002 |
| Genotype                           | F (1, 101) = 16,37 | P=0,0001 |

| Tukey's multiple comparisons test | Adjusted P Value |
|-----------------------------------|------------------|
| VEHICLE:WT vs. VEHICLE:CD         | P <0,0001        |
| VEHICLE:WT vs. CURVER:WT          | P =0,9640        |
| VEHICLE:WT vs. CURVER:CD          | P =0,9995        |
| VEHICLE:CD vs. CURVER:CD          | P <0,0001        |

| Two-way ANOVA Thickness LV | F (DFn, DFd)      | P value  |
|----------------------------|-------------------|----------|
| Interaction                | F (1, 25) = 7,988 | P=0,0091 |
| Treatment                  | F (1, 25) = 3,832 | P=0,0615 |
| Genotype                   | F (1, 25) = 14,30 | P=0,0009 |

| Tukey's multiple comparisons test | Adjusted P Value |
|-----------------------------------|------------------|
| VEHICLE:WT vs. VEHICLE:CD         | P= 0,0009        |
| VEHICLE:WT vs. CURVER:WT          | P=0,9306         |
| VEHICLE:WT vs. CURVER:CD          | P= 0,5941        |
| VEHICLE:CD vs. CURVER:CD          | P= 0,0099        |

**Supplemental Table S4: Statistical data of 3-NT and XOR**

| <b>Two-way ANOVA 3-NT Aorta</b> | <b>F (DFn, DFd)</b> | <b>P value</b> |
|---------------------------------|---------------------|----------------|
| Interaction                     | F (1, 28) = 12,12   | P=0,0017       |
| Treatment                       | F (1, 28) = 11,27   | P=0,0023       |
| Genotype                        | F (1, 28) = 7,793   | P=0,0093       |

| <b>Tukey's multiple comparisons test</b> | <b>Adjusted P Value</b> |
|------------------------------------------|-------------------------|
| VEHICLE:WT vs. VEHICLE:CD                | P=0,0008                |
| VEHICLE:WT vs. CURVER:WT                 | P=0,9997                |
| VEHICLE:WT vs. CURVER:CD                 | P=0,9756                |
| VEHICLE:CD vs. CURVER:CD                 | P =0.0007               |

| <b>ANOVA table XOR Aorta<br/>(Immunofluorescence)</b> | <b>F (DFn, DFd)</b> | <b>P value</b> |
|-------------------------------------------------------|---------------------|----------------|
| Interaction                                           | F (1, 19) = 5,952   | P=0,0247       |
| Treatment                                             | F (1, 19) = 11,49   | P=0,0031       |
| Genotype                                              | F (1, 19) = 2,167   | P=0,1574       |

| <b>Tukey's multiple comparisons test</b> | <b>Adjusted P Value</b> |
|------------------------------------------|-------------------------|
| VEHICLE:WT vs. VEHICLE:CD                | P=0,0478                |
| VEHICLE:WT vs. CURVER:WT                 | P=0,9002                |
| VEHICLE:WT vs. CURVER:CD                 | P=0,5591                |
| VEHICLE:CD vs. CURVER:CD                 | P=0,0037                |

| <b>One-way ANOVA XOR Aorta (Western)</b> | <b>F (DFn, DFd)</b> | <b>P value</b> |
|------------------------------------------|---------------------|----------------|
| Treatment                                | F (2, 21) = 34,02   | P<0,0001       |

| <b>Tukey's multiple comparisons test</b> | <b>Adjusted P Value</b> |
|------------------------------------------|-------------------------|
| VEHICLE:WT vs. VEHICLE:CD                | P=0,0014                |
| VEHICLE:WT vs. CURVER:CD                 | P=0,5770                |
| VEHICLE:CD vs. CURVER:CD                 | P=0,0004                |

| <b>Two-way ANOVA 3-NT LV</b> | <b>F (DFn, DFd)</b> | <b>P value</b> |
|------------------------------|---------------------|----------------|
| Interaction                  | F (1, 36) = 39,09   | P<0,0001       |
| Treatment                    | F (1, 36) = 13,10   | P=0,0009       |
| Genotype                     | F (1, 36) = 29,96   | P<0,0001       |

| <b>Tukey's multiple comparisons test</b> | <b>Adjusted P Value</b> |
|------------------------------------------|-------------------------|
| VEHICLE:WT vs. VEHICLE:CD                | P<0,0001                |
| VEHICLE:WT vs. CURVER:WT                 | P=0,2959                |

|                          |           |
|--------------------------|-----------|
| VEHICLE:WT vs. CURVER:CD | P=0,5088  |
| VEHICLE:CD vs. CURVER:CD | P <0,0001 |

#### Two-way ANOVA XOR LV (Immunofluorescence)

|             | F (DFn, DFd)      | P value  |
|-------------|-------------------|----------|
| Interaction | F (1, 16) = 2,697 | P=0,1201 |
| Treatment   | F (1, 16) = 8,725 | P=0,0093 |
| Genotype    | F (1, 16) = 8,653 | P=0,0096 |

#### One-way ANOVA XOR LV (Western)

|           | F (DFn, DFd)      | P value  |
|-----------|-------------------|----------|
| Treatment | F (2, 21) = 34,02 | P<0,0001 |

#### Tukey's multiple comparisons test

#### Adjusted P Value

|                           |          |
|---------------------------|----------|
| VEHICLE:WT vs. VEHICLE:CD | P<0,0001 |
| VEHICLE:WT vs. CURVER:CD  | P=0,0145 |
| VEHICLE:CD vs. CURVER:CD  | P=0,0001 |

### Supplemental Table S5: Statistical data of pNRF2

#### Two-way ANOVA Aorta

|             | F (DFn, DFd)      | P value  |
|-------------|-------------------|----------|
| Interaction | F (1, 34) = 19,30 | P=0,0001 |
| Treatment   | F (1, 34) = 17,89 | P=0,0002 |
| Genotype    | F (1, 34) = 36,27 | P<0,0001 |

#### Tukey's multiple comparisons test

#### Adjusted P Value

|                           |           |
|---------------------------|-----------|
| VEHICLE:WT vs. VEHICLE:CD | P<0,0001  |
| VEHICLE:WT vs. CURVER:WT  | P=0,9995  |
| VEHICLE:WT vs. CURVER:CD  | P=0,5890  |
| VEHICLE:CD vs. CURVER:CD  | P <0,0001 |

#### One Way ANOVA Heart

|           | F (DFn, DFd) | P value  |
|-----------|--------------|----------|
| Treatment | F (2,28) = 8 | P=0.0014 |

#### Tukey's multiple comparisons test

#### Adjusted P Value

|                           |          |
|---------------------------|----------|
| VEHICLE WT vs. VEHICLE CD | P=0.0084 |
| VEHICLE WT vs. CURVER CD  | P=0.8771 |
| VEHICLE CD vs. CURVER CD  | P=0.002  |

**Supplemental Table S6: Statistical data of treatment intake and body weight**

| <b>Two-way RM ANOVA Intake-MALES</b>     |                           |                |
|------------------------------------------|---------------------------|----------------|
|                                          | <b>F (DFn, DFd)</b>       | <b>P value</b> |
| Treatment x Time                         | F (45, 240) = 0,7963      | P=0,8189       |
| Treatment                                | F (3, 16) = 0,2570        | P=0,8552       |
| Time                                     | F (6,238, 99,80) = 0,6699 | P=0,6799       |
| <b>Two-way RM ANOVA Intake-FEMALES</b>   |                           |                |
|                                          | <b>F (DFn, DFd)</b>       | <b>P value</b> |
| Treatment x Time                         | F (45, 240) = 0,7335      | P=0,8936       |
| Treatment                                | F (3, 16) = 1,846         | P=0,1794       |
| Time                                     | F (6,061, 96,97) = 0,9496 | P=0,4642       |
| <b>Two-way ANOVA Intake- WT vs CD</b>    |                           |                |
|                                          | <b>F (DFn, DFd)</b>       | <b>P value</b> |
| Interaction                              | F (3, 24) = 0,1347        | P=0,9384       |
| Treatment                                | F (3, 24) = 0,5263        | P=0,6685       |
| Genotype                                 | F (1, 24) = 2,915         | P=0,1007       |
| <b>Two-way ANOVA Body weight- MALES</b>  |                           |                |
|                                          | <b>F (DFn, DFd)</b>       | <b>P value</b> |
| Interaction                              | F (3, 102) = 0,9029       | P=0,4425       |
| Treatment                                | F (3, 102) = 1,219        | P=0,3068       |
| Genotype                                 | F (1, 102) = 92,76        | P<0,0001       |
| <b>Two-way ANOVA Body weight-FEMALES</b> |                           |                |
|                                          | <b>F (DFn, DFd)</b>       | <b>P value</b> |
| Interaction                              | F (3, 62) = 1,681         | P=0,1803       |
| Treatment                                | F (3, 62) = 1,483         | P=0,2279       |
| Genotype                                 | F (1, 62) = 38,57         | P<0,0001       |

## Supplemental Figure

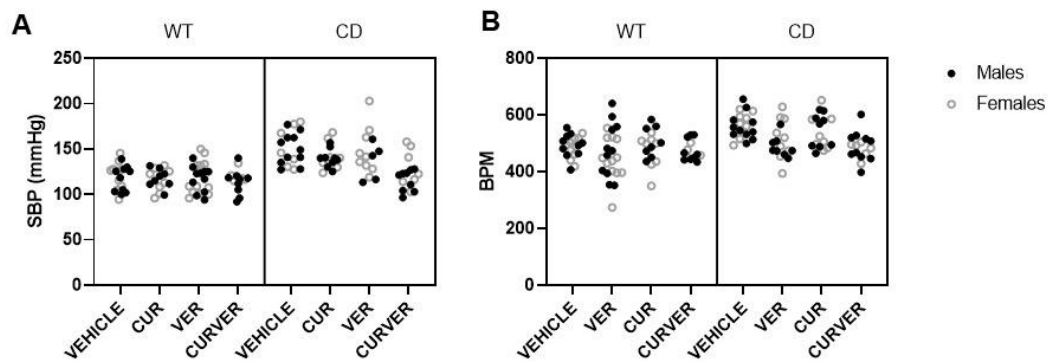

**Figure S1: No effect of sex on SBP and BPM**

(A) SBP and (B) BPM measurements in the conscious state using the indirect tail-cuff method in WT (n=14-23) and CD (n=14-18) mice treated with single (CUR, VER) or combined (CURVER) treatments. No significant differences were observed due to sex. Data are represented as mean  $\pm$  SEM. Three-way ANOVA. Statistical data in Tables S1

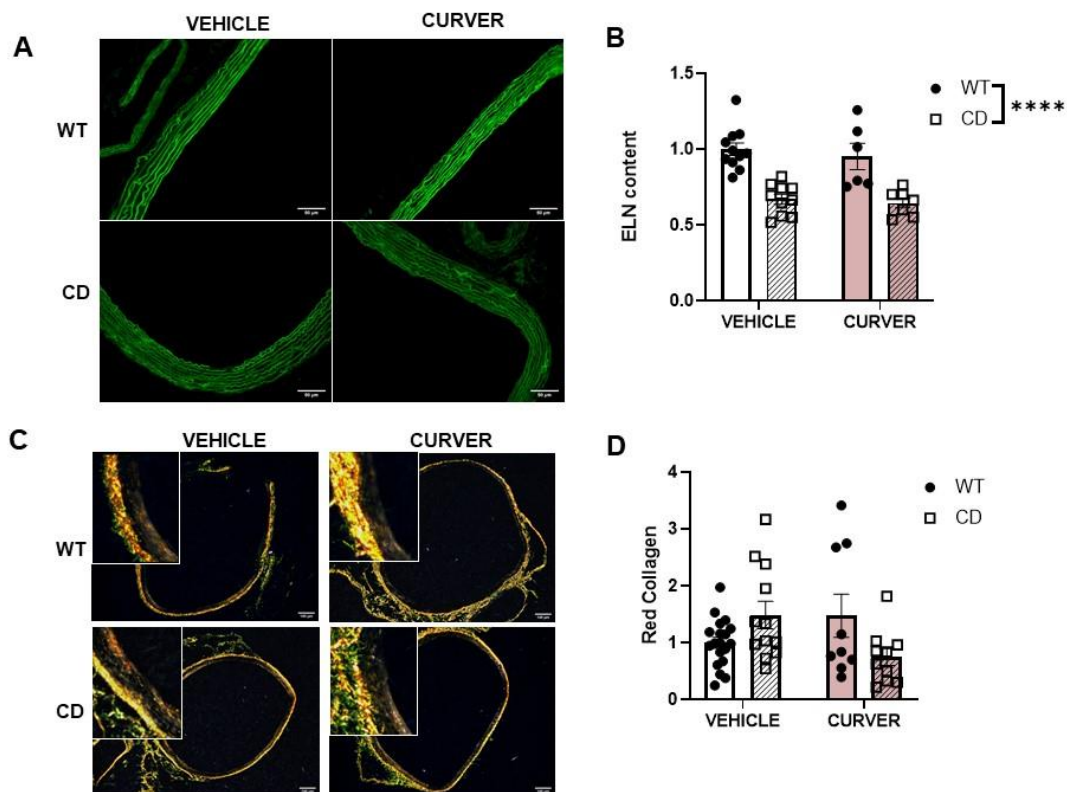

**Figure S2: Analysis of ascending aortas**

(A) Representative images of green autofluorescence ELN of ascending aortas (B) No significant differences were observed in ELN content due to treatment. (C) Representative images of ascending aortas under polarised light. A representative magnification is presented in the upper left box. (D) No significant differences were



observed in mature (red) collagen content. Data are represented as mean  $\pm$  SEM. Two-way ANOVA. Statistical data in Tables S2

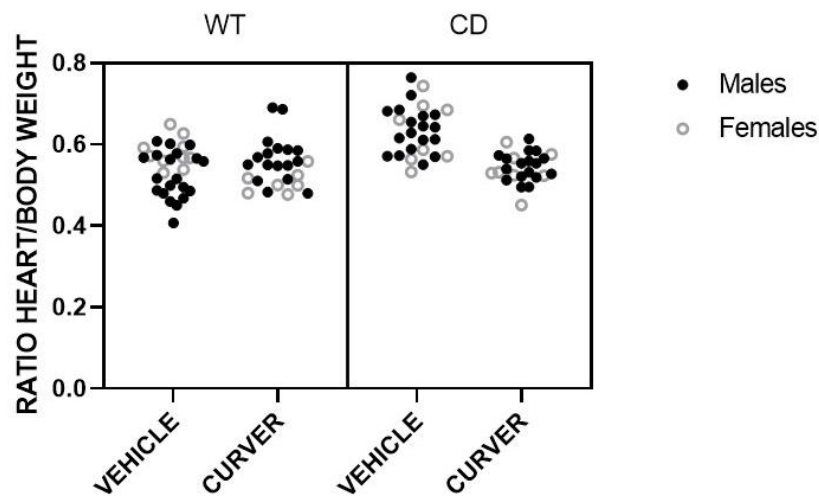

**Figure S3: No effect of sex on the heart vs body weight ratio**

Data are represented as mean  $\pm$  SEM. Three-way ANOVA. Statistical data in Table S3

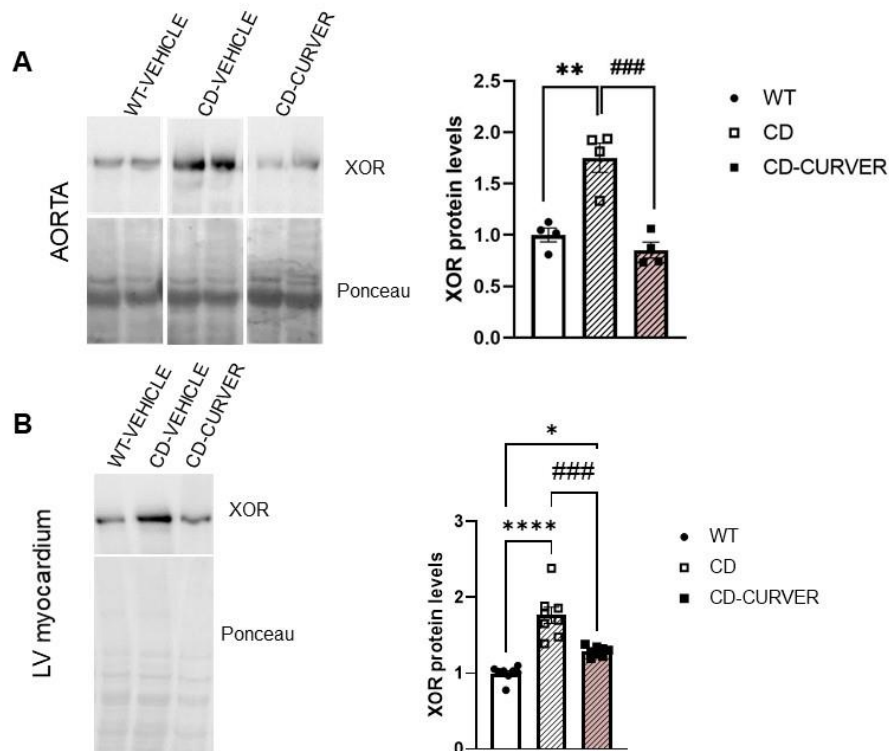

**Figure S4: Western blot analysis of XOR levels in ascending aortas and LV-myocardium**

Representative images of western blot analysis and the corresponding histogram quantification. Significant difference among groups are shown after one-way ANOVA

followed by Tukey's multiple comparisons test for ascending aorta ( $F_{(2,9)} = 22$ ,  $p = 0.0003$ ) **(A)** and LV-myocardium ( $F_{(2,21)} = 34.02$ ,  $p < 0.0001$ ) **(B)**.

Data are represented as mean  $\pm$  SEM. \* Effect of genotype; #, effect of treatment. \*\*\*,####  $p < 0.001$ ; \*\*\*\*,#####  $p < 0.0001$ . Statistical data in Table S4

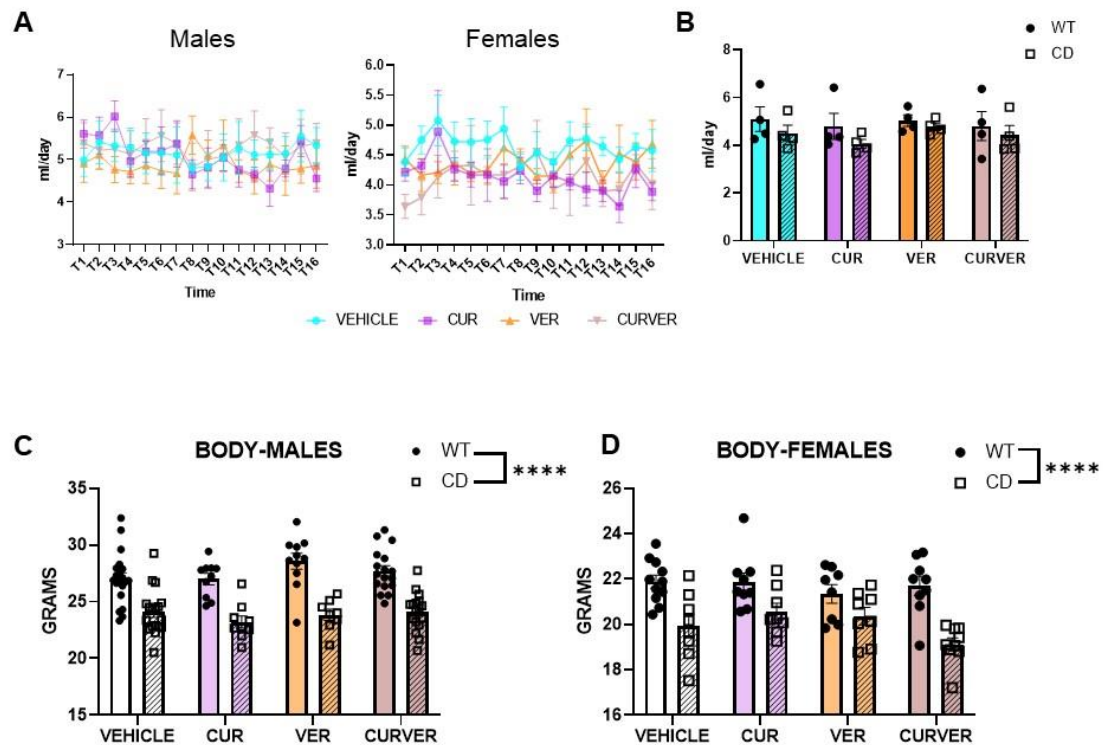

**Figure S5: Treatment intake and body weight**

**(A)** The amount of drunk per cage was quantified and normalised to the number of animals per cage (2 to 4) and to the time between each change (48 to 60 hours). Consumption was not significantly different between groups ( $F_{45,240} = 0.7963$ ,  $p = 0.8189$  in males;  $F_{45,240} = 0.7335$ ,  $p = 0.8936$  in females). **(B)** Daily intake was not significantly different among WT mice and the other groups ( $F_{3,24} = 0.134$ ,  $p = 0.9384$ ). **(C, D)**. None of the treatments altered the reduced body weight presented by CD compared with WT mice (effect of genotype  $F_{1,102} = 92.76$ ,  $p < 0.0001$  in males;  $F_{1,62} = 38.57$ ,  $p < 0.0001$  in females).
